# Supplementary material for: STAT6 contributes to renal fibrosis by modulating PPARα-mediated tubular fatty acid oxidation
Source: PubMed Central journal article supplement (PMC8770798; doi:10.1038/s41419-022-04515-3), 2022-01-19
Supplement: 41419_2022_4515_MOESM8_ESM.pdf [file 41419_2022_4515_MOESM8_ESM.pdf]

Please complete the table below to indicate the contributions of all named authors to the figures.

Figure 1:

|  |
|--|
|  |
|--|

Figure 2:

|  |
|--|
|  |
|--|

Figure 3:

|  |
|--|
|  |
|--|

Figure 4:

|  |
|--|
|  |
|--|

Figure 5:

|  |
|--|
|  |
|--|

Figure 6:

|  |
|--|
|  |
|--|

Signed for and on behalf of the Author(s):

*Shashu Tu*

Print Name:

Date:
